# Supplementary material
Source: PubMed Central journal article supplement (PMC5154955)
Supplement: NIHMS825598-supplement-01.pdf [file NIHMS825598-supplement-01.pdf]

*Conclusion*

In a large homogeneous sample of bipolar I sample, we did not identify persisting sleep disturbances in bipolar patients other than related to increased depressive symptoms. The meta-analysis points in the direction of longer sleep duration, WASO and sleep onset latency and lower sleep efficiency in bipolar patients. The majority of these differences in the meta-analysis were however small, the overall number of participants limited and the question remains whether they reflect clinically significant sleep disturbances. Furthermore, non-affected siblings showed normal sleep-wake patterns. Overall in our data sleep disturbances are a state marker of mood symptomatology which underscores the need for further study of the persistence of disturbance in sleep-wake patterns in euthymic bipolar disorder patients and in patients before disease onset.

**Supplementary Figures**

**Supplementary Figure 1** – Actograms of a bipolar patient (A), non-affected sibling (B) and healthy control (C). Black lines indicate activity levels per minute. Dark blue intervals indicate sleep and lighter blue intervals indicate sleep onset latency (wake prior to sleep) or sleep inertia (wake after sleep).

**Supplementary table 1 – Analysis of variability in sleep measures**

| <b>A</b>            | <i>Patients</i> |           | <i>Siblings</i> |           | <i>Controls</i> |           |
|---------------------|-----------------|-----------|-----------------|-----------|-----------------|-----------|
|                     | <i>M</i>        | <i>SD</i> | <i>M</i>        | <i>SD</i> | <i>M</i>        | <i>SD</i> |
| Sleep duration      | 82.49           | 41.0      | 67.29           | 24.83     | 76.12           | 33.32     |
| Sleep onset         | 63.74           | 37.17     | 54.59           | 27.21     | 62.35           | 31.48     |
| Sleep onset latency | 9.81            | 10.90     | 10.26           | 14.99     | 12.16           | 29.70     |
| Sleep efficiency    | 4.60            | 3.69      | 5.15            | 4.66      | 4.82            | 4.09      |
| WASO                | 20.26           | 13.19     | 19.57           | 13.75     | 20.73           | 18.03     |
| Sleep offset        | 71.49           | 34.90     | 57.35           | 24.98     | 68.39           | 35.45     |
| Sleep inertia       | 9.42            | 11.45     | 10.13           | 10.53     | 8.73            | 14.15     |

  

| <b>B</b>       | <i>Patients vs Siblings</i> |          | <i>Patients vs Controls</i> |          | <i>Siblings vs Controls</i> |          |
|----------------|-----------------------------|----------|-----------------------------|----------|-----------------------------|----------|
|                | <i>β</i>                    | <i>p</i> | <i>β</i>                    | <i>p</i> | <i>β</i>                    | <i>p</i> |
| Sleep duration | 13.37                       | 0.02     | 7.68                        | 0.15     | 5.69                        | 0.33     |

|                     |       |      |       |      |       |      |
|---------------------|-------|------|-------|------|-------|------|
| Sleep onset         | 7.12  | 0.16 | 3.08  | 0.53 | 4.04  | 0.46 |
| Sleep onset latency | -0.51 | 0.87 | -2.26 | 0.45 | 1.75  | 0.59 |
| Sleep efficiency    | -0.59 | 0.36 | -0.17 | 0.78 | -0.41 | 0.54 |
| WASO                | 0.17  | 0.94 | -0.09 | 0.97 | 0.26  | 0.92 |
| Sleep offset        | 11.42 | 0.03 | 5.38  | 0.27 | 6.04  | 0.25 |
| Sleep inertia       | -0.93 | 0.62 | 0.91  | 0.62 | -1.84 | 0.36 |

| <b>C</b>            | <i>Patients vs Siblings</i> |                 | <i>Patients vs Controls</i> |                 | <i>Siblings vs Controls</i> |                 |
|---------------------|-----------------------------|-----------------|-----------------------------|-----------------|-----------------------------|-----------------|
|                     | <b><math>\beta</math></b>   | <b><i>p</i></b> | <b><math>\beta</math></b>   | <b><i>p</i></b> | <b><math>\beta</math></b>   | <b><i>p</i></b> |
| Sleep duration      | 8.38                        | 0.15            | 1.93                        | 0.74            | 6.44                        | 0.26            |
| Sleep onset         | 4.16                        | 0.45            | -0.21                       | 0.97            | 4.37                        | 0.42            |
| Sleep onset latency | -0.51                       | 0.87            | -2.26                       | 0.44            | 1.76                        | 0.59            |
| Sleep efficiency    | -0.67                       | 0.34            | -0.26                       | 0.70            | -0.40                       | 0.56            |
| WASO                | -2.68                       | 0.26            | -3.24                       | 0.20            | 0.56                        | 0.82            |
| Sleep offset        | 9.14                        | 0.10            | 2.84                        | 0.59            | 6.30                        | 0.23            |
| Sleep inertia       | -0.39                       | 0.85            | 1.51                        | 0.46            | -1.90                       | 0.34            |

Table A: Means and standard deviations of variability in sleep measures

Table B: Beta ( $\beta$ ) and *p*-values of patients vs siblings, patients versus controls and siblings versus controls;  
Random factor: relatedness; Covariates: age and gender

Table C: Beta ( $\beta$ ) and *p*-values of patients vs siblings, patients versus controls and siblings versus controls;  
Random factor: relatedness; Covariates: age, gender and IDS-SR score

**Supplementary table 2 – Association of sleep with number of manic episodes, depressive episodes and rapid cycling**

|                     | <i>Nr of manic episodes</i> |                 | <i>Nr of depr episodes</i> |                 | <i>Rapid cycling</i>      |                 |
|---------------------|-----------------------------|-----------------|----------------------------|-----------------|---------------------------|-----------------|
|                     | <b><math>\beta</math></b>   | <b><i>p</i></b> | <b><math>\beta</math></b>  | <b><i>p</i></b> | <b><math>\beta</math></b> | <b><i>p</i></b> |
| Sleep duration      | -0.03                       | 0.76            | -0.04                      | 0.74            | -0.03                     | 0.74            |
| Sleep onset         | 0.02                        | 0.88            | -0.03                      | 0.79            | 0.09                      | 0.39            |
| Sleep onset latency | -0.21                       | 0.04            | -0.03                      | 0.80            | -0.10                     | 0.36            |
| Sleep efficiency    | 0.18                        | 0.08            | 0.17                       | 0.11            | 0.06                      | 0.56            |
| WASO                | -0.16                       | 0.13            | -0.19                      | 0.08            | -0.02                     | 0.85            |
| Sleep offset        | -0.02                       | 0.88            | -0.06                      | 0.56            | 0.05                      | 0.63            |
| Sleep inertia       | -0.15                       | 0.15            | -0.10                      | 0.34            | -0.13                     | 0.20            |

Beta ( $\beta$ ) and *p*-values of association between illness characteristics and sleep pattern
